# Supplementary material for: The commonly used electron donor 2,6-dichlorophenolindophenol also serves as an efficient electron acceptor for Photosystem I
Source: Research Square preprint supplement (doi:10.21203/rs.3.rs-7917984/v1), 2025-11-06
Supplement: Supplementary file 1 [file f8bd20aa5e1caed6847e6056.docx]

**Supplementary information**

**S1. Parameters of biexponential decompositions**

**Table S1.1** Lifetimes and amplitudes of exponential components corresponding to P700+ reduction via backward electron transfer or by the external electron donor depending on the concentration of DCPIP under aerobic conditions

| **DCPIP concentration, µM** | characteristic time, ms | | amplitude, % | |
| --- | --- | --- | --- | --- |
| τ1 | τ2 | A1 | A2 |
| **0.5** | 69 | 7565 | 76 | 24 |
| **1.5** | 58 | 2595 | 75 | 25 |
| **5** | 60 | 1728 | 69 | 31 |
| **15** | 46 | 476 | 60 | 40 |
| **50** | 24 | 165 | 41 | 59 |

**Table S1.2** Lifetimes and amplitudes of exponential components corresponding to P700+ reduction via backward electron transfer or by the external electron donor depending on the concentration of TMPD under aerobic conditions

| **TMPD concentration, µM** | characteristic time, ms | | amplitude, % | |
| --- | --- | --- | --- | --- |
| τ1 | τ2 | A1 | A2 |
| **0.5** | 78 | 6034 | 69 | 31 |
| **1.5** | 73 | 4704 | 71 | 29 |
| **5** | 77 | 2729 | 70 | 30 |
| **15** | 78 | 1063 | 67 | 33 |
| **50** | 71 | 536 | 61 | 39 |

**Table S1.3** Lifetimes and amplitudes of exponential components corresponding to P700+ reduction via backward electron transfer or by the external electron donor depending on the concentration of DCPIP under anaerobic conditions

| **DCPIP concentration, µM** | characteristic time, ms | | amplitude, % | |
| --- | --- | --- | --- | --- |
| τ1 | τ2 | A1 | A2 |
| **0.5** | 88 | 3420 | 81 | 19 |
| **1.5** | 98 | 4899 | 77 | 23 |
| **5** | 78 | 1610 | 73 | 27 |
| **15** | 78 | 1149 | 73 | 27 |
| **50** | 47 | 291 | 55 | 45 |

**Table S1.4** Lifetimes and amplitudes of exponential components corresponding to P700+ reduction via backward electron transfer or by the external electron donor depending on the concentration of TMPD under anaerobic conditions

| **TMPD concentration, µM** | characteristic time, ms | | amplitude, % | |
| --- | --- | --- | --- | --- |
| τ1 | τ2 | A1 | A2 |
| **0.5** | 89 | 4434 | 79 | 21 |
| **1.5** | 92 | 4296 | 74 | 26 |
| **5** | 100 | 2995 | 72 | 28 |
| **15** | 83 | 1805 | 71 | 29 |
| **50** | 69 | 781 | 64 | 36 |

**S2. Kinetic modelling of the redox-reactions of the redox-mediators with PSI.**

The redox transitions of the PSI and its interaction with exogenous redox mediators can be described by the following system of reactions (see Fig. 2 in the manuscript):

Here, P700 is the special chlorophyll dimer in PSI, F denotes terminal 4Fe-4S electron acceptors within the system, which can interact with exogenous electron acceptors; RmD and RmA are electron-donating and electron-accepting forms of redox-mediators DCPIP or TMPD at variable concentration; AscD and AscA are electron-donating and electron-accepting forms of sodium ascorbate (at constant concentration). *k*i are the corresponding rate constants.

Let

[P700+F–] = *s*

[P700+F] = *p*

[RmD] = *d*

[AscD] = *d0*

[RmA] = *a*

[AscA] = *a0*

Experimentally measured signal of [P700+] therefore can be denoted as *y* = [P700+] = *s* + *p*. Let us introduce additional variables:

*m1= kd*d + kd0*d0 + ka*a + ka0*a0 + kr*

*m2= ka*a + ka0*a0*

*m3= kd*d + kd0*d0*

Thus, evolution of [P700+] can be described with linear differential equations:

*ds/dt = –kr*s – kd*d*s – kd0*d0*s – ka*a*s – ka0*a0*s =
 = –(kr+kd*d+ kd0*d0+ka*a+ ka0*a0)*s = –m1*s*

*s = exp(–m1*t)*  (S1)

*dp/dt = –kd*d*p – kd0*d0*p + ka*a*s + ka0*a0*s = –(kd*d + kd0*d0)*p + (ka*a + ka0*a0)*s =
 = –m3*p + m2*s*  (S2)

Substituting (S1) into (S2)

*dp/dt = –m3*p+m2*exp(–m1*t)*

*p’ + m3p = m2*exp(–m1*t)*  (S3)

To solve this equation, let

*p=u(t)*v(t)*  (S4)

Substituting (S4) into (S3)

*u’v + uv’ + m3*uv = m2*exp(–m1*t)*

*u’v + u(v’ + m3*v) = m2*exp(–m1*t)*  (S5)

Solution of (S6) is equivalent to the system:

*v’+m3*v =* 0 (S6)

*u’v = m2*exp(–m1*t)*  (S7)

Substituting solution of (S6)

*v = exp(–m3*t)*  (S8)

into (S7)

*u’*exp(–m3*t) = m2*exp(–m1*t)*

*u’ = m2*exp((m3–m1)*t)*

*u = m2/(m3–m1)*exp((m3–m1)*t)+C1*  (S9)

Substituting (S8) and (S9) into (S4)

*p = u*v= (m2/( m3–m1)*exp((m3–m1)*t)+C1) * exp(–m3*t)*

*p(t) = m2/(m3–m1)*exp(–m1*t)+C1*exp(–m3*t)*

Considering that

*p(*0*) =* 0 *= m2/(m3–m1) + C1*

*C1 = –m2/(m3–m1)*

*p(t) = m2/(m3–m1)*(exp(–m1*t) – exp(–m3*t))*  (S10)

Substituting (S3) and (S10) into original definition of *y(t)*

*y = s+p= exp(–m1*t) + m2/(m3–m1)*(exp(–m1*t) – exp(–m3*t))*

*y = (m3 – m1 + m2)/(m3–m1)*exp(–m1*t) – m2/( m3–m1)*exp(–m3*t)*

*y = kr/(m2+kr)*exp(–m1*t) + m2/(m2+kr)*exp(–m3*t)*

If we approximate the experimental signal *y(t)* with a sum of two exponential functions with characteristic times *τ1* and *τ2* and relative amplitudes *А1* and *А2 (A1+A2=*1*)*,

*A1 = kr/(kr+ka*a+ka0*a0)*

*A2 = (ka*a+ka0*a0)/(kr+ka*a+ka0*a0)*

1*/τ1 = kd*d + kd0*d0 + ka*a + ka0*a0 + kr*

1*/τ2 = kd*d + kd0*d0*

These equations were used to fit the experimentally observed values of *τ1*, *τ2* and *А1*.
